# Supplementary material for: Lung Secretoglobin Scgb1a1 Influences Alveolar Macrophage-Mediated Inflammation and Immunity
Source: PubMed Central journal article supplement (PMC7558713; doi:10.3389/fimmu.2020.584310), 2020-10-01
Supplement: Data_Sheet_1.pdf [file Data_Sheet_1.pdf]

## *Supplementary Material*

### **Supplementary Tables**

Table S1: Ten most significantly upregulated and downregulated genes in AMs from wild type (WT) mice.

| Comparison (WT time course) | Gene name            | Gene expression | FDR      | Gene description                                                                                             |
|-----------------------------|----------------------|-----------------|----------|--------------------------------------------------------------------------------------------------------------|
| 8wks vs 4wks                | <i>Hmcn1</i>         | Upregulation    | 1.56E-05 | hemicentin 1 [Source:MGI Symbol;Acc:MGI:2685047]                                                             |
|                             | <i>Ggt1</i>          |                 | 1.79E-04 | gamma-glutamyltransferase 1 [Source:MGI Symbol;Acc:MGI:95706]                                                |
|                             | <i>C1qc</i>          |                 | 3.82E-03 | complement component 1, q subcomponent, C chain [Source:MGI Symbol;Acc:MGI:88225]                            |
|                             | <i>Cd209a</i>        |                 | 1.79E-04 | CD209a antigen [Source:MGI Symbol;Acc:MGI:2157942]                                                           |
|                             | <i>Heph</i>          |                 | 1.14E-03 | hephaestin [Source:MGI Symbol;Acc:MGI:1332240]                                                               |
|                             | <i>Lipn</i>          |                 | 1.32E-03 | lipase, family member N [Source:MGI Symbol;Acc:MGI:1917416]                                                  |
|                             | <i>Ighm</i>          |                 | 2.33E-02 | immunoglobulin heavy constant mu [Source:MGI Symbol;Acc:MGI:96448]                                           |
|                             | <i>AI427809</i>      |                 | 1.12E-03 | expressed sequence AI427809 [Source:MGI Symbol;Acc:MGI:2140270]                                              |
|                             | <i>Fam19a5</i>       |                 | 1.78E-03 | family with sequence similarity 19, member A5 [Source:MGI Symbol;Acc:MGI:2146182]                            |
|                             | <i>Osbp15</i>        |                 | 3.99E-04 | oxysterol binding protein-like 5 [Source:MGI Symbol;Acc:MGI:1930265]                                         |
|                             | <i>Gm26742</i>       | Downregulation  | 2.29E-05 | predicted gene, 26742 [Source:MGI Symbol;Acc:MGI:5477236]                                                    |
|                             | <i>Gm3235</i>        |                 | 7.11E-03 | predicted gene 3235 [Source:MGI Symbol;Acc:MGI:3781413]                                                      |
|                             | <i>Arhgap29</i>      |                 | 2.07E-03 | Rho GTPase activating protein 29 [Source:MGI Symbol;Acc:MGI:2443818]                                         |
|                             | <i>Spink2</i>        |                 | 2.01E-03 | serine peptidase inhibitor, Kazal type 2 [Source:MGI Symbol;Acc:MGI:1917232]                                 |
|                             | <i>Sash1</i>         |                 | 1.57E-02 | SAM and SH3 domain containing 1 [Source:MGI Symbol;Acc:MGI:1917347]                                          |
|                             | <i>Plxn1</i>         |                 | 9.20E-03 | plexin B1 [Source:MGI Symbol;Acc:MGI:2154238]                                                                |
|                             | <i>Smad6</i>         |                 | 1.26E-03 | SMAD family member 6 [Source:MGI Symbol;Acc:MGI:1336883]                                                     |
|                             | <i>Lrrtm2</i>        |                 | 3.15E-02 | leucine rich repeat transmembrane neuronal 2 [Source:MGI Symbol;Acc:MGI:2389174]                             |
|                             | <i>Fmr1nb</i>        |                 | 4.22E-02 | Fmr1 neighbor [Source:MGI Symbol;Acc:MGI:2672032]                                                            |
|                             | <i>Igf2bp3</i>       |                 | 1.86E-05 | insulin-like growth factor 2 mRNA binding protein 3 [Source:MGI Symbol;Acc:MGI:1890359]                      |
| 12wks vs 4 wks              | <i>Ggt1</i>          | Upregulation    | 6.72E-05 | gamma-glutamyltransferase 1 [Source:MGI Symbol;Acc:MGI:95706]                                                |
|                             | <i>Heph</i>          |                 | 2.25E-04 | hephaestin [Source:MGI Symbol;Acc:MGI:1332240]                                                               |
|                             | <i>Cd209a</i>        |                 | 5.83E-05 | CD209a antigen [Source:MGI Symbol;Acc:MGI:2157942]                                                           |
|                             | <i>Pla2g2d</i>       |                 | 4.48E-02 | phospholipase A2, group IID [Source:MGI Symbol;Acc:MGI:1341796]                                              |
|                             | <i>Slamf8</i>        |                 | 1.18E-03 | SLAM family member 8 [Source:MGI Symbol;Acc:MGI:1921998]                                                     |
|                             | <i>Fam19a5</i>       |                 | 4.67E-04 | family with sequence similarity 19, member A5 [Source:MGI Symbol;Acc:MGI:2146182]                            |
|                             | <i>Hmcn1</i>         |                 | 3.85E-04 | hemicentin 1 [Source:MGI Symbol;Acc:MGI:2685047]                                                             |
|                             | <i>Sstr5</i>         |                 | 1.06E-03 | somatostatin receptor 5 [Source:MGI Symbol;Acc:MGI:894282]                                                   |
|                             | <i>Tlr1</i>          |                 | 9.17E-04 | toll-like receptor 1 [Source:MGI Symbol;Acc:MGI:1341295]                                                     |
|                             | <i>Fam20c</i>        |                 | 3.12E-04 | family with sequence similarity 20, member C [Source:MGI Symbol;Acc:MGI:2136853]                             |
|                             | <i>Tln2</i>          | Downregulation  | 2.26E-02 | talin 2 [Source:MGI Symbol;Acc:MGI:1917799]                                                                  |
|                             | <i>Gm26584</i>       |                 | 2.08E-02 | predicted gene, 26584 [Source:MGI Symbol;Acc:MGI:5477078]                                                    |
|                             | <i>Gm15530</i>       |                 | 3.24E-03 | predicted gene 15530 [Source:MGI Symbol;Acc:MGI:3782978]                                                     |
|                             | <i>Cspg4</i>         |                 | 6.34E-03 | chondroitin sulfate proteoglycan 4 [Source:MGI Symbol;Acc:MGI:2153093]                                       |
|                             | <i>Spink2</i>        |                 | 4.52E-03 | serine peptidase inhibitor, Kazal type 2 [Source:MGI Symbol;Acc:MGI:1917232]                                 |
|                             | <i>4933400F21Rik</i> |                 | 2.04E-02 | RIKEN cDNA 4933400F21 gene [Source:MGI Symbol;Acc:MGI:1921653]                                               |
|                             | <i>Rab36</i>         |                 | 1.10E-02 | RAB36, member RAS oncogene family [Source:MGI Symbol;Acc:MGI:1924127]                                        |
|                             | <i>Sash1</i>         |                 | 1.57E-02 | SAM and SH3 domain containing 1 [Source:MGI Symbol;Acc:MGI:1917347]                                          |
|                             | <i>Igf2bp3</i>       |                 | 4.14E-05 | insulin-like growth factor 2 mRNA binding protein 3 [Source:MGI Symbol;Acc:MGI:1890359]                      |
|                             | <i>Nov</i>           |                 | 2.70E-03 | nephroblastoma overexpressed gene [Source:MGI Symbol;Acc:MGI:109185]                                         |
| 40wks vs 4wks               | <i>Hmcn1</i>         | Upregulation    | 2.41E-05 | hemicentin 1 [Source:MGI Symbol;Acc:MGI:2685047]                                                             |
|                             | <i>Lipn</i>          |                 | 2.63E-03 | lipase, family member N [Source:MGI Symbol;Acc:MGI:1917416]                                                  |
|                             | <i>Ggt1</i>          |                 | 4.56E-03 | gamma-glutamyltransferase 1 [Source:MGI Symbol;Acc:MGI:95706]                                                |
|                             | <i>Heph</i>          |                 | 1.85E-02 | hephaestin [Source:MGI Symbol;Acc:MGI:1332240]                                                               |
|                             | <i>AI427809</i>      |                 | 6.07E-03 | expressed sequence AI427809 [Source:MGI Symbol;Acc:MGI:2140270]                                              |
|                             | <i>Cd209a</i>        |                 | 9.40E-03 | CD209a antigen [Source:MGI Symbol;Acc:MGI:2157942]                                                           |
|                             | <i>Osbp15</i>        |                 | 1.12E-03 | oxysterol binding protein-like 5 [Source:MGI Symbol;Acc:MGI:1930265]                                         |
|                             | <i>Scd1</i>          |                 | 4.87E-05 | stearoyl-Coenzyme A desaturase 1 [Source:MGI Symbol;Acc:MGI:98239]                                           |
|                             | <i>Emp2</i>          |                 | 1.46E-02 | epithelial membrane protein 2 [Source:MGI Symbol;Acc:MGI:1098726]                                            |
|                             | <i>Mfsd6</i>         |                 | 2.08E-05 | major facilitator superfamily domain containing 6 [Source:MGI Symbol;Acc:MGI:1922925]                        |
|                             | <i>Pkdcc</i>         | Downregulation  | 1.06E-02 | protein kinase domain containing, cytoplasmic [Source:MGI Symbol;Acc:MGI:2147077]                            |
|                             | <i>Cspg4</i>         |                 | 7.73E-03 | chondroitin sulfate proteoglycan 4 [Source:MGI Symbol;Acc:MGI:2153093]                                       |
|                             | <i>Gm9725</i>        |                 | 1.82E-02 | predicted gene 9725 [Source:MGI Symbol;Acc:MGI:3646552]                                                      |
|                             | <i>Spink2</i>        |                 | 5.83E-03 | serine peptidase inhibitor, Kazal type 2 [Source:MGI Symbol;Acc:MGI:1917232]                                 |
|                             | <i>Nfatc2</i>        |                 | 3.66E-02 | nuclear factor of activated T cells, cytoplasmic, calcineurin dependent 2 [Source:MGI Symbol;Acc:MGI:102463] |
|                             | <i>Smad6</i>         |                 | 3.13E-03 | SMAD family member 6 [Source:MGI Symbol;Acc:MGI:1336883]                                                     |
|                             | <i>Micall2</i>       |                 | 2.56E-02 | MICAL-like 2 [Source:MGI Symbol;Acc:MGI:2444818]                                                             |
|                             | <i>Sash1</i>         |                 | 9.79E-03 | SAM and SH3 domain containing 1 [Source:MGI Symbol;Acc:MGI:1917347]                                          |
|                             | <i>Nov</i>           |                 | 6.86E-03 | nephroblastoma overexpressed gene [Source:MGI Symbol;Acc:MGI:109185]                                         |
|                             | <i>Igf2bp3</i>       |                 | 3.30E-05 | insulin-like growth factor 2 mRNA binding protein 3 [Source:MGI Symbol;Acc:MGI:1890359]                      |

Table S2: Upregulated and downregulated gene sets in WT AMs.

| GO: Molecular Function                              |                                                     |                                       |             |          | GO: Biological process                       |                                                 |                                              |                                         |          |          |          |
|-----------------------------------------------------|-----------------------------------------------------|---------------------------------------|-------------|----------|----------------------------------------------|-------------------------------------------------|----------------------------------------------|-----------------------------------------|----------|----------|----------|
| Comparison (WT)                                     | Pathway_ID                                          | Set Size                              | Mean Log FC | FDR      | Comparison (WT)                              | Pathway_ID                                      | Set Size                                     | lean Log F                              | FDR      |          |          |
| 8wks vs 4wks                                        | GO:0042277 peptide binding                          | 153                                   | 4.129       | 8.39E-03 | 8wks vs 4wks                                 | GO:0045087 innate immune response               | 422                                          | 4.921                                   | 2.51E-03 |          |          |
|                                                     | GO:0033218 amide binding                            | 179                                   | 3.956       | 1.27E-02 |                                              | 12wks vs 4wks                                   | GO:0045087 innate immune response            | 422                                     | 6.790    | 5.51E-08 |          |
|                                                     | GO:0004872 receptor activity                        | 371                                   | 3.849       | 1.54E-02 |                                              | GO:0043207 response to external biotic stimulus | 469                                          | 5.490                                   | 3.63E-05 |          |          |
|                                                     | GO:0005198 structural molecule activity             | 309                                   | 3.520       | 3.89E-02 |                                              | GO:0051707 response to other organism           | 469                                          | 5.490                                   | 3.63E-05 |          |          |
|                                                     | GO:0008009 chemokine activity                       | 19                                    | 3.515       | 3.89E-02 |                                              | GO:0098542 defense response to other organism   | 279                                          | 5.466                                   | 3.63E-05 |          |          |
|                                                     | GO:0016491 oxidoreductase activity                  | 478                                   | 3.389       | 4.68E-02 |                                              | GO:0009607 response to biotic stimulus          | 495                                          | 5.421                                   | 3.63E-05 |          |          |
| 12wks vs 4wks                                       | GO:0022891 substrate-specific transmembrane transp  | 384                                   | 3.377       | 4.68E-02 | GO:0002252 immune effector process           | 443                                             | 5.136                                        | 1.38E-04                                |          |          |          |
|                                                     | GO:0003735 structural constituent of ribosome       | 143                                   | -4.419      | 6.90E-03 | GO:0034341 response to interferon-gamma      | 63                                              | 4.723                                        | 1.44E-03                                |          |          |          |
|                                                     | GO:0042277 peptide binding                          | 153                                   | 3.612       | 4.84E-02 | GO:0050776 regulation of immune response     | 426                                             | 4.630                                        | 2.15E-03                                |          |          |          |
|                                                     | GO:0033218 amide binding                            | 179                                   | 3.556       | 4.84E-02 | GO:0001817 regulation of cytokine production | 389                                             | 4.513                                        | 2.15E-03                                |          |          |          |
|                                                     | GO:0004872 receptor activity                        | 371                                   | 3.522       | 4.84E-02 | GO:0002250 adaptive immune response          | 227                                             | 4.392                                        | 2.83E-03                                |          |          |          |
|                                                     | GO:0003735 structural constituent of ribosome       | 143                                   | -5.506      | 4.86E-05 | GO:0009617 response to bacterium             | 290                                             | 4.392                                        | 2.83E-03                                |          |          |          |
| 40wks vs 4wks                                       | GO:0003735 structural constituent of ribosome       | 143                                   | -5.506      | 1.04E-03 | GO:0034097 response to cytokine              | 465                                             | 4.366                                        | 2.83E-03                                |          |          |          |
| KEGG disease                                        |                                                     |                                       |             |          | KEGG metabolism                              |                                                 |                                              |                                         |          |          |          |
| Comparison (WT)                                     | Pathway_ID                                          | Set Size                              | Mean Log FC | FDR      | Comparison (WT)                              | Pathway_ID                                      | Set Size                                     | lean Log F                              | FDR      |          |          |
| 8wks vs 4wks                                        | mmu05169 Epstein-Barr virus infection               | 167                                   | 3.865       | 1.19E-02 | 8wks vs 4wks                                 | mmu04612 Antigen processing and presentation    | 55                                           | 4.090                                   | 3.55E-03 |          |          |
|                                                     | mmu05164 Influenza A                                | 125                                   | 3.543       | 1.19E-02 |                                              | mmu04145 Phagosome                              | 120                                          | 4.095                                   | 3.55E-03 |          |          |
|                                                     | mmu05150 Staphylococcus aureus infection            | 31                                    | 2.617       | 3.54E-02 |                                              | mmu04514 Cell adhesion molecules (CAMs)         | 60                                           | 3.690                                   | 7.70E-03 |          |          |
|                                                     | mmu05162 Measles                                    | 93                                    | 2.442       | 4.69E-02 |                                              | mmu03010 Ribosome                               | 133                                          | -5.213                                  | 5.37E-05 |          |          |
|                                                     | mmu05016 Huntington's disease                       | 152                                   | 3.381       | 1.19E-02 |                                              | 12wks vs 4wks                                   | mmu04612 Antigen processing and presentation | 55                                      | 4.176    | 3.75E-03 |          |
|                                                     | mmu05320 Autoimmune thyroid disease                 | 26                                    | 3.330       | 1.19E-02 |                                              |                                                 | mmu00100 Steroid biosynthesis                | 15                                      | 3.831    | 1.42E-02 |          |
|                                                     | mmu04932 Non-alcoholic fatty liver disease (NAFLD)  | 127                                   | 3.287       | 1.19E-02 |                                              |                                                 | mmu04145 Phagosome                           | 120                                     | 3.640    | 1.21E-02 |          |
|                                                     | mmu05330 Allograft rejection                        | 27                                    | 3.188       | 1.19E-02 |                                              |                                                 | mmu04514 Cell adhesion molecules (CAMs)      | 60                                      | 3.556    | 1.42E-02 |          |
|                                                     | mmu04940 Type I diabetes mellitus                   | 30                                    | 3.165       | 1.50E-02 |                                              |                                                 | mmu03050 Proteasome                          | 44                                      | 3.058    | 4.87E-02 |          |
|                                                     | mmu05332 Graft-versus-host disease                  | 27                                    | 2.488       | 4.69E-02 |                                              |                                                 | mmu00190 Oxidative phosphorylation           | 112                                     | -3.079   | 4.24E-02 |          |
|                                                     | mmu05416 Viral myocarditis                          | 48                                    | -2.654      | 3.51E-02 |                                              | mmu03010 Ribosome                               | 133                                          | -6.223                                  | 3.65E-07 |          |          |
|                                                     | mmu05168 Herpes simplex infection                   | 158                                   | -3.117      | 1.19E-02 |                                              | 40wks vs 4wks                                   | mmu04612 Antigen processing and presentation | 55                                      | 3.784    | 1.51E-02 |          |
|                                                     | 12wks vs 4wks                                       | mmu05169 Epstein-Barr virus infection | 167         | 4.202    |                                              |                                                 | 1.29E-03                                     | mmu04145 Phagosome                      | 120      | 3.383    | 3.22E-02 |
|                                                     |                                                     | mmu05164 Influenza A                  | 125         | 3.472    |                                              |                                                 | 6.41E-03                                     | mmu04514 Cell adhesion molecules (CAMs) | 60       | 3.280    | 3.22E-02 |
|                                                     |                                                     | mmu05168 Herpes simplex infection     | 158         | 3.228    |                                              |                                                 | 7.88E-03                                     | mmu00100 Steroid biosynthesis           | 15       | -3.127   | 4.37E-02 |
|                                                     |                                                     | mmu05416 Viral myocarditis            | 48          | 3.220    |                                              |                                                 | 7.88E-03                                     | mmu03010 Ribosome                       | 133      | -5.590   | 9.55E-06 |
| mmu05150 Staphylococcus aureus infection            |                                                     | 31                                    | 3.215       | 9.13E-03 |                                              |                                                 |                                              |                                         |          |          |          |
| mmu05162 Measles                                    |                                                     | 93                                    | 2.668       | 2.61E-02 |                                              |                                                 |                                              |                                         |          |          |          |
| mmu05167 Kaposi's sarcoma-associated herpesvirus ii |                                                     | 149                                   | 2.526       | 3.31E-02 |                                              |                                                 |                                              |                                         |          |          |          |
| mmu05203 Viral carcinogenesis                       |                                                     | 167                                   | 2.486       | 3.31E-02 |                                              |                                                 |                                              |                                         |          |          |          |
| mmu05152 Tuberculosis                               |                                                     | 128                                   | 2.426       | 3.51E-02 |                                              |                                                 |                                              |                                         |          |          |          |
| mmu05134 Legionellosis                              |                                                     | 51                                    | 2.320       | 4.25E-02 |                                              |                                                 |                                              |                                         |          |          |          |
| mmu05160 Hepatitis C                                |                                                     | 116                                   | 2.290       | 4.25E-02 |                                              |                                                 |                                              |                                         |          |          |          |
| mmu05145 Toxoplasmosis                              |                                                     | 79                                    | 2.220       | 4.96E-02 |                                              |                                                 |                                              |                                         |          |          |          |
| mmu05330 Allograft rejection                        |                                                     | 27                                    | 3.711       | 6.41E-03 |                                              |                                                 |                                              |                                         |          |          |          |
| mmu05320 Autoimmune thyroid disease                 |                                                     | 26                                    | 3.523       | 7.88E-03 |                                              |                                                 |                                              |                                         |          |          |          |
| mmu04940 Type I diabetes mellitus                   |                                                     | 30                                    | 3.309       | 7.88E-03 |                                              |                                                 |                                              |                                         |          |          |          |
| mmu05332 Graft-versus-host disease                  |                                                     | 27                                    | 3.203       | 9.13E-03 |                                              |                                                 |                                              |                                         |          |          |          |
| mmu05322 Systemic lupus erythematosus               | 52                                                  | 2.556                                 | 3.31E-02    |          |                                              |                                                 |                                              |                                         |          |          |          |
| mmu05020 Prion diseases                             | 24                                                  | 2.545                                 | 3.51E-02    |          |                                              |                                                 |                                              |                                         |          |          |          |
| mmu05418 Fluid shear stress and atherosclerosis     | 94                                                  | 2.363                                 | 3.98E-02    |          |                                              |                                                 |                                              |                                         |          |          |          |
| mmu04932 Non-alcoholic fatty liver disease (NAFLD)  | 127                                                 | -3.205                                | 7.88E-03    |          |                                              |                                                 |                                              |                                         |          |          |          |
| mmu05016 Huntington's disease                       | 152                                                 | -3.594                                | 6.41E-03    |          |                                              |                                                 |                                              |                                         |          |          |          |
| 40wks vs 4wks                                       | mmu05169 Epstein-Barr virus infection               | 167                                   | 3.405       | 2.60E-02 |                                              |                                                 |                                              |                                         |          |          |          |
|                                                     | mmu05164 Influenza A                                | 125                                   | 3.253       | 2.60E-02 |                                              |                                                 |                                              |                                         |          |          |          |
|                                                     | mmu05168 Herpes simplex infection                   | 158                                   | 3.185       | 2.60E-02 |                                              |                                                 |                                              |                                         |          |          |          |
|                                                     | mmu05150 Staphylococcus aureus infection            | 31                                    | 2.726       | 3.57E-02 |                                              |                                                 |                                              |                                         |          |          |          |
|                                                     | mmu05416 Viral myocarditis                          | 48                                    | 2.636       | 3.57E-02 |                                              |                                                 |                                              |                                         |          |          |          |
|                                                     | mmu05167 Kaposi's sarcoma-associated herpesvirus ii | 149                                   | 2.562       | 3.60E-02 |                                              |                                                 |                                              |                                         |          |          |          |
|                                                     | mmu05162 Measles                                    | 93                                    | 2.546       | 3.57E-02 |                                              |                                                 |                                              |                                         |          |          |          |
|                                                     | mmu05016 Huntington's disease                       | 152                                   | 3.294       | 2.60E-02 |                                              |                                                 |                                              |                                         |          |          |          |
|                                                     | mmu05320 Autoimmune thyroid disease                 | 26                                    | 2.971       | 2.60E-02 |                                              |                                                 |                                              |                                         |          |          |          |
|                                                     | mmu04932 Non-alcoholic fatty liver disease (NAFLD)  | 127                                   | 2.806       | 3.57E-02 |                                              |                                                 |                                              |                                         |          |          |          |
|                                                     | mmu04940 Type I diabetes mellitus                   | 30                                    | 2.796       | 3.57E-02 |                                              |                                                 |                                              |                                         |          |          |          |
|                                                     | mmu05322 Systemic lupus erythematosus               | 52                                    | 2.469       | 3.72E-02 |                                              |                                                 |                                              |                                         |          |          |          |
|                                                     | mmu05332 Graft-versus-host disease                  | 27                                    | -2.573      | 3.57E-02 |                                              |                                                 |                                              |                                         |          |          |          |
|                                                     | mmu05330 Allograft rejection                        | 27                                    | -2.949      | 2.60E-02 |                                              |                                                 |                                              |                                         |          |          |          |

Table S3: Ten most significantly upregulated and downregulated genes in AMs from *Scgbl1*-knockout (KO) mice.

| Comparison (KO time course) | Gene name            | Gene expression | FDR                                                                                     | Gene description                                                                                                    |
|-----------------------------|----------------------|-----------------|-----------------------------------------------------------------------------------------|---------------------------------------------------------------------------------------------------------------------|
| 8wks vs 4wks                | <i>Uty</i>           | Upregulation    | 4.38E-03                                                                                | ubiquitously transcribed tetratricopeptide repeat gene, Y chromosome [Source:MGI Symbol;Acc:MGI:894810]             |
|                             | <i>Eif2s3y</i>       |                 | 1.02E-02                                                                                | eukaryotic translation initiation factor 2, subunit 3, structural gene Y-linked [Source:MGI Symbol;Acc:MGI:1349430] |
|                             | <i>Ddx3y</i>         |                 | 4.15E-03                                                                                | DEAD (Asp-Glu-Ala-Asp) box polypeptide 3, Y-linked [Source:MGI Symbol;Acc:MGI:1349406]                              |
|                             | <i>Slamf8</i>        |                 | 2.74E-03                                                                                | SLAM family member 8 [Source:MGI Symbol;Acc:MGI:1921998]                                                            |
|                             | <i>Sstr5</i>         |                 | 2.06E-02                                                                                | somatostatin receptor 5 [Source:MGI Symbol;Acc:MGI:894282]                                                          |
|                             | <i>Acod1</i>         |                 | 1.24E-03                                                                                | aconitate decarboxylase 1 [Source:MGI Symbol;Acc:MGI:103206]                                                        |
|                             | <i>Ggt1</i>          |                 | 1.91E-03                                                                                | gamma-glutamyltransferase 1 [Source:MGI Symbol;Acc:MGI:95706]                                                       |
|                             | <i>Cd209a</i>        |                 | 1.72E-03                                                                                | CD209a antigen [Source:MGI Symbol;Acc:MGI:2157942]                                                                  |
|                             | <i>Kdm5d</i>         |                 | 3.98E-03                                                                                | lysine (K)-specific demethylase 5D [Source:MGI Symbol;Acc:MGI:99780]                                                |
|                             | <i>Spic</i>          |                 | 2.49E-05                                                                                | Spi-C transcription factor (Spi-1/PU.1 related) [Source:MGI Symbol;Acc:MGI:1341168]                                 |
|                             | <i>Zfp979</i>        |                 | 3.42E-02                                                                                | zinc finger protein 979 [Source:MGI Symbol;Acc:MGI:2148252]                                                         |
|                             | <i>Zfp119b</i>       |                 | 2.36E-02                                                                                | zinc finger protein 119b [Source:MGI Symbol;Acc:MGI:2385323]                                                        |
|                             | <i>Gm13369</i>       |                 | 5.64E-03                                                                                | predicted gene 13369 [Source:MGI Symbol;Acc:MGI:3651010]                                                            |
|                             | <i>Tln2</i>          | Downregulation  | 1.78E-02                                                                                | talín 2 [Source:MGI Symbol;Acc:MGI:1917799]                                                                         |
|                             | <i>Gm28286</i>       |                 | 2.03E-02                                                                                | predicted gene 28286 [Source:MGI Symbol;Acc:MGI:5578992]                                                            |
|                             | <i>Cspg4</i>         |                 | 3.21E-03                                                                                | chondroitin sulfate proteoglycan 4 [Source:MGI Symbol;Acc:MGI:2153093]                                              |
|                             | <i>Adcy4</i>         |                 | 4.55E-02                                                                                | adenylate cyclase 4 [Source:MGI Symbol;Acc:MGI:99674]                                                               |
|                             | <i>Smad6</i>         |                 | 3.38E-03                                                                                | SMAD family member 6 [Source:MGI Symbol;Acc:MGI:1336883]                                                            |
|                             | <i>Igf2bp3</i>       |                 | 3.62E-04                                                                                | insulin-like growth factor 2 mRNA binding protein 3 [Source:MGI Symbol;Acc:MGI:1890359]                             |
| <i>Fhdc1</i>                |                      | 4.14E-02        | FH2 domain containing 1 [Source:MGI Symbol;Acc:MGI:2684972]                             |                                                                                                                     |
| 12wks vs 4 wks              | <i>Uty</i>           | Upregulation    | 3.29E-03                                                                                | ubiquitously transcribed tetratricopeptide repeat gene, Y chromosome [Source:MGI Symbol;Acc:MGI:894810]             |
|                             | <i>Ddx3y</i>         |                 | 7.17E-03                                                                                | DEAD (Asp-Glu-Ala-Asp) box polypeptide 3, Y-linked [Source:MGI Symbol;Acc:MGI:1349406]                              |
|                             | <i>Eif2s3y</i>       |                 | 2.33E-02                                                                                | eukaryotic translation initiation factor 2, subunit 3, structural gene Y-linked [Source:MGI Symbol;Acc:MGI:1349430] |
|                             | <i>Cd209a</i>        |                 | 1.29E-03                                                                                | CD209a antigen [Source:MGI Symbol;Acc:MGI:2157942]                                                                  |
|                             | <i>Slamf8</i>        |                 | 1.82E-02                                                                                | SLAM family member 8 [Source:MGI Symbol;Acc:MGI:1921998]                                                            |
|                             | <i>Kdm5d</i>         |                 | 6.08E-03                                                                                | lysine (K)-specific demethylase 5D [Source:MGI Symbol;Acc:MGI:99780]                                                |
|                             | <i>Acod1</i>         |                 | 1.58E-02                                                                                | aconitate decarboxylase 1 [Source:MGI Symbol;Acc:MGI:103206]                                                        |
|                             | <i>Cd40</i>          |                 | 1.01E-03                                                                                | CD40 antigen [Source:MGI Symbol;Acc:MGI:88336]                                                                      |
|                             | <i>A1427809</i>      |                 | 9.54E-03                                                                                | expressed sequence A1427809 [Source:MGI Symbol;Acc:MGI:2140270]                                                     |
|                             | <i>Esrrg</i>         |                 | 1.90E-02                                                                                | estrogen-related receptor gamma [Source:MGI Symbol;Acc:MGI:1347056]                                                 |
|                             | <i>Sash1</i>         |                 | 3.39E-02                                                                                | SAM and SH3 domain containing 1 [Source:MGI Symbol;Acc:MGI:1917347]                                                 |
|                             | <i>Cspg4</i>         |                 | 7.67E-04                                                                                | chondroitin sulfate proteoglycan 4 [Source:MGI Symbol;Acc:MGI:2153093]                                              |
|                             | <i>E330009J07Rik</i> |                 | 1.06E-04                                                                                | RIKEN cDNA E330009J07 gene [Source:MGI Symbol;Acc:MGI:2444256]                                                      |
|                             | <i>Dusp1</i>         |                 | 3.22E-03                                                                                | dual specificity phosphatase 1 [Source:MGI Symbol;Acc:MGI:105120]                                                   |
|                             | <i>Sik1</i>          | Downregulation  | 5.85E-03                                                                                | salt inducible kinase 1 [Source:MGI Symbol;Acc:MGI:104754]                                                          |
|                             | <i>E230001N04Rik</i> |                 | 3.23E-03                                                                                | RIKEN cDNA E230001N04 gene [Source:MGI Symbol;Acc:MGI:2443549]                                                      |
|                             | <i>Igf2bp3</i>       |                 | 1.06E-04                                                                                | insulin-like growth factor 2 mRNA binding protein 3 [Source:MGI Symbol;Acc:MGI:1890359]                             |
|                             | <i>Nov</i>           |                 | 1.18E-02                                                                                | nephroblastoma overexpressed gene [Source:MGI Symbol;Acc:MGI:109185]                                                |
|                             | <i>Smad6</i>         |                 | 2.54E-04                                                                                | SMAD family member 6 [Source:MGI Symbol;Acc:MGI:1336883]                                                            |
| <i>Tln2</i>                 |                      | 1.37E-04        | talín 2 [Source:MGI Symbol;Acc:MGI:1917799]                                             |                                                                                                                     |
| 40wks vs 4wks               | <i>Pla2g2d</i>       | Upregulation    | 7.02E-04                                                                                | phospholipase A2, group IID [Source:MGI Symbol;Acc:MGI:1341796]                                                     |
|                             | <i>BC051142</i>      |                 | 3.92E-08                                                                                | cDNA sequence BC051142 [Source:MGI Symbol;Acc:MGI:3039565]                                                          |
|                             | <i>Ccdc7a</i>        |                 | 6.58E-06                                                                                | coiled-coil domain containing 7A [Source:MGI Symbol;Acc:MGI:1921953]                                                |
|                             | <i>Hmcn1</i>         |                 | 8.08E-08                                                                                | hemicentin 1 [Source:MGI Symbol;Acc:MGI:2685047]                                                                    |
|                             | <i>A1427809</i>      |                 | 1.60E-05                                                                                | expressed sequence A1427809 [Source:MGI Symbol;Acc:MGI:2140270]                                                     |
|                             | <i>C130026I21Rik</i> |                 | 8.72E-07                                                                                | RIKEN cDNA C130026I21 gene [Source:MGI Symbol;Acc:MGI:3612702]                                                      |
|                             | <i>Uty</i>           |                 | 3.15E-03                                                                                | ubiquitously transcribed tetratricopeptide repeat gene, Y chromosome [Source:MGI Symbol;Acc:MGI:894810]             |
|                             | <i>Esrrg</i>         |                 | 1.04E-04                                                                                | estrogen-related receptor gamma [Source:MGI Symbol;Acc:MGI:1347056]                                                 |
|                             | <i>Lipn</i>          |                 | 7.86E-05                                                                                | lipase, family member N [Source:MGI Symbol;Acc:MGI:1917416]                                                         |
|                             | <i>Dpysl3</i>        |                 | 9.99E-05                                                                                | dihydropyrimidinase-like 3 [Source:MGI Symbol;Acc:MGI:1349762]                                                      |
|                             | <i>Zfp979</i>        |                 | 1.56E-04                                                                                | zinc finger protein 979 [Source:MGI Symbol;Acc:MGI:2148252]                                                         |
|                             | <i>Zfp979</i>        |                 | 1.56E-04                                                                                | zinc finger protein 979 [Source:MGI Symbol;Acc:MGI:2148252]                                                         |
|                             | <i>Cd93</i>          |                 | 9.68E-06                                                                                | CD93 antigen [Source:MGI Symbol;Acc:MGI:106664]                                                                     |
|                             | <i>Sik1</i>          |                 | 4.10E-03                                                                                | salt inducible kinase 1 [Source:MGI Symbol;Acc:MGI:104754]                                                          |
|                             | <i>Fhdc1</i>         | Downregulation  | 1.63E-02                                                                                | FH2 domain containing 1 [Source:MGI Symbol;Acc:MGI:2684972]                                                         |
|                             | <i>Hfm1</i>          |                 | 1.99E-02                                                                                | HFM1, ATP-dependent DNA helicase homolog [Source:MGI Symbol;Acc:MGI:3036246]                                        |
|                             | <i>Arhgap29</i>      |                 | 4.29E-05                                                                                | Rho GTPase activating protein 29 [Source:MGI Symbol;Acc:MGI:2443818]                                                |
|                             | <i>Smad6</i>         |                 | 2.39E-05                                                                                | SMAD family member 6 [Source:MGI Symbol;Acc:MGI:1336883]                                                            |
|                             | <i>Egfm1</i>         |                 | 2.16E-06                                                                                | EGF-like and EMI domain containing 1 [Source:MGI Symbol;Acc:MGI:1922990]                                            |
| <i>Igf2bp3</i>              |                      | 1.82E-05        | insulin-like growth factor 2 mRNA binding protein 3 [Source:MGI Symbol;Acc:MGI:1890359] |                                                                                                                     |

Table S4: Up-regulated and downregulated gene sets in KO AMs.

a. GO: Biological process pathways

| Comparison (WT, Pathway_ID)                           | Set Size | Mean Log FC | FDR      |
|-------------------------------------------------------|----------|-------------|----------|
| 8wks vs 4wks                                          |          |             |          |
| GO:0045087 innate immune response                     | 422      | 4.961       | 2.09E-03 |
| GO:0043207 response to external biotic stimulus       | 469      | 4.578       | 3.98E-03 |
| GO:0051707 response to other organism                 | 469      | 4.578       | 3.98E-03 |
| GO:0098542 defense response to other organism         | 279      | 4.514       | 3.98E-03 |
| GO:0002252 immune effector process                    | 443      | 4.485       | 3.98E-03 |
| GO:0009607 response to biotic stimulus                | 495      | 4.056       | 2.19E-02 |
| GO:0019882 antigen processing and presentation        | 71       | 4.002       | 2.28E-02 |
| GO:0009615 response to virus                          | 187      | 3.963       | 2.28E-02 |
| GO:0050776 regulation of immune response              | 426      | 4.078       | 2.28E-02 |
| GO:0051607 defense response to virus                  | 154      | 3.917       | 2.28E-02 |
| GO:0034341 response to interferon-gamma               | 63       | 3.771       | 3.62E-02 |
| GO:0048002 antigen processing and presentation        | 43       | 3.766       | 3.62E-02 |
| GO:0001819 positive regulation of cytokine production | 262      | 3.711       | 4.22E-02 |
| GO:0002443 leukocyte mediated immunity                | 208      | 3.807       | 4.22E-02 |
| GO:0001817 regulation of cytokine production          | 389      | 3.674       | 4.22E-02 |
| GO:0002250 adaptive immune response                   | 227      | 3.640       | 4.22E-02 |
| GO:0009617 response to bacterium                      | 290      | 3.627       | 4.22E-02 |
| GO:0019725 cellular homeostasis                       | 466      | 3.646       | 4.22E-02 |
| 12wks vs 4wks                                         |          |             |          |
| GO:0045087 innate immune response                     | 422      | 4.650       | 9.27E-03 |
| GO:0043207 response to external biotic stimulus       | 469      | 4.155       | 1.78E-02 |
| GO:0051707 response to other organism                 | 469      | 4.155       | 1.78E-02 |
| GO:0098542 defense response to other organism         | 279      | 4.168       | 1.78E-02 |
| GO:0002252 immune effector process                    | 443      | 4.146       | 1.78E-02 |
| GO:0009607 response to biotic stimulus                | 495      | 4.026       | 2.42E-02 |

b. KEGG metabolism

| Comparison (WT, Pathway_ID)                  | Set Size | Mean Log FC | FDR      |
|----------------------------------------------|----------|-------------|----------|
| 8wks vs 4wks                                 |          |             |          |
| mmu04514 Cell adhesion molecules (CAMs)      | 60       | 4.048       | 1.14E-02 |
| mmu04612 Antigen processing and presentation | 55       | 3.873       | 1.14E-02 |
| 12wks vs 4wks                                |          |             |          |
| mmu04514 Cell adhesion molecules (CAMs)      | 60       | 3.795       | 2.65E-02 |
| mmu04612 Antigen processing and presentation | 55       | 3.616       | 2.65E-02 |
| 40wks vs 4wks                                |          |             |          |
| mmu04514 Cell adhesion molecules (CAMs)      | 60       | 4.270       | 5.94E-03 |
| mmu04612 Antigen processing and presentation | 55       | -3.614      | 1.97E-02 |

c. KEGG disease

| Comparison (WT, Pathway_ID)            | Set Size | Mean Log FC | FDR      |
|----------------------------------------|----------|-------------|----------|
| 8wks vs 4wks                           |          |             |          |
| mmu05416 Viral myocarditis             | 48       | 3.45        | 8.32E-03 |
| mmu05164 Influenza A                   | 125      | 3.29        | 1.25E-02 |
| mmu05169 Epstein-Barr virus infection  | 167      | 3.05        | 1.25E-02 |
| mmu05152 Tuberculosis                  | 128      | 3.15        | 1.36E-02 |
| mmu05145 Toxoplasmosis                 | 79       | 2.83        | 4.35E-02 |
| mmu05168 Herpes simplex infection      | 158      | 2.45        | 4.35E-02 |
| mmu05330 Allograft rejection           | 27       | 4.15        | 7.76E-03 |
| mmu05322 Systemic lupus erythematosu   | 52       | 3.76        | 8.32E-03 |
| mmu05150 Staphylococcus aureus infecti | 31       | 3.34        | 9.39E-03 |
| mmu05320 Autoimmune thyroid disease    | 26       | 3.34        | 1.03E-02 |
| mmu05332 Graft-versus-host disease     | 27       | 3.21        | 1.25E-02 |
| mmu04940 Type I diabetes mellitus      | 30       | 2.66        | 3.32E-02 |
| mmu05310 Asthma                        | 11       | 2.48        | 4.35E-02 |
| 12wks vs 4wks                          |          |             |          |
| mmu05416 Viral myocarditis             | 48       | 3.38        | 1.59E-02 |
| mmu05150 Staphylococcus aureus infecti | 31       | 3.37        | 1.59E-02 |
| mmu05164 Influenza A                   | 125      | 2.92        | 2.28E-02 |
| mmu05169 Epstein-Barr virus infection  | 167      | 2.88        | 2.28E-02 |
| mmu05152 Tuberculosis                  | 128      | 2.76        | 2.60E-02 |
| mmu05145 Toxoplasmosis                 | 79       | 2.49        | 4.39E-02 |
| mmu05330 Allograft rejection           | 27       | 3.74        | 1.59E-02 |
| mmu05322 Systemic lupus erythematosu   | 52       | 3.28        | 1.59E-02 |
| mmu05320 Autoimmune thyroid disease    | 26       | 3.12        | 2.28E-02 |
| mmu05332 Graft-versus-host disease     | 27       | 2.95        | 2.54E-02 |
| mmu04940 Type I diabetes mellitus      | 30       | 2.83        | 2.71E-02 |
| mmu05310 Asthma                        | 11       | 2.99        | 3.80E-02 |
| 40wks vs 4wks                          |          |             |          |
| mmu05416 Viral myocarditis             | 48       | 4.11        | 5.29E-03 |
| mmu05150 Staphylococcus aureus infecti | 31       | 3.74        | 6.14E-03 |
| mmu05164 Influenza A                   | 125      | 3.40        | 7.13E-03 |
| mmu05169 Epstein-Barr virus infection  | 167      | 3.49        | 7.13E-03 |
| mmu05330 Allograft rejection           | 27       | 4.67        | 1.97E-03 |
| mmu05322 Systemic lupus erythematosu   | 52       | 3.81        | 6.14E-03 |
| mmu05320 Autoimmune thyroid disease    | 26       | 3.49        | 6.70E-03 |
| mmu05332 Graft-versus-host disease     | 27       | 3.93        | 9.98E-03 |

Table S5: Ten most significantly upregulated and downregulated genes in WT and KO AMs.

| Comparison (KO vs WT) | Gene name            | Gene expression | FDR                                                                                  | Gene description                                                                                                                   |
|-----------------------|----------------------|-----------------|--------------------------------------------------------------------------------------|------------------------------------------------------------------------------------------------------------------------------------|
| 4wks                  | <i>Nuak2</i>         | Upregulation    | 2.91E-02                                                                             | NUAK family, SNF1-like kinase, 2 [Source:MGI Symbol,Acc:MGI:1921387]                                                               |
|                       | <i>Arddc3</i>        |                 | 2.91E-02                                                                             | Arrestin domain containing 3 [Source:MGI Symbol,Acc:MGI:2145242]                                                                   |
|                       | <i>Myc</i>           | Downregulation  | 3.39E-02                                                                             | Myelocytomatosis oncogene [Source:MGI Symbol,Acc:MGI:97250]                                                                        |
|                       | <i>Kl</i>            |                 | 3.39E-02                                                                             | Klotho [Source:MGI Symbol,Acc:MGI:1101771]                                                                                         |
|                       | <i>Herpud1</i>       | Upregulation    | 1.84E-02                                                                             | Homocysteine-inducible, endoplasmic reticulum stress-inducible, ubiquitin-like domain member 1 [Source:MGI Symbol,Acc:MGI:1927406] |
|                       | <i>Snx27</i>         |                 | 2.31E-02                                                                             | Sorting nexin family member 27 [Source:MGI Symbol,Acc:MGI:1923992]                                                                 |
|                       | <i>Galnt7</i>        |                 | 2.42E-02                                                                             | Polypeptide N-acetylgalactosaminyltransferase 7 [Source:MGI Symbol,Acc:MGI:1349449]                                                |
|                       | <i>Cenpf</i>         |                 | 2.91E-02                                                                             | Centromere protein F [Source:MGI Symbol,Acc:MGI:1313302]                                                                           |
|                       | <i>Cenpe</i>         |                 | 2.91E-02                                                                             | Centromere protein E [Source:MGI Symbol,Acc:MGI:1098230]                                                                           |
|                       | <i>Crip1</i>         |                 | 2.91E-02                                                                             | Cysteine-rich protein 1 (intestinal) [Source:MGI Symbol,Acc:MGI:88501]                                                             |
| <i>Dnajb9</i>         | 2.91E-02             |                 | DnaJ heat shock protein family (Hsp40) member B9 [Source:MGI Symbol,Acc:MGI:1351618] |                                                                                                                                    |
| <i>Runx1</i>          | 2.91E-02             |                 | Runt related transcription factor 1 [Source:MGI Symbol,Acc:MGI:99852]                |                                                                                                                                    |
| <i>Fndc3a</i>         | 3.19E-02             |                 | Fibronectin type III domain containing 3A [Source:MGI Symbol,Acc:MGI:1196463]        |                                                                                                                                    |
| <i>Cytip</i>          | 3.48E-02             |                 | Cytohesin 1 interacting protein [Source:MGI Symbol,Acc:MGI:2183535]                  |                                                                                                                                    |
| 8wks                  | <i>Pilra</i>         | Downregulation  | 7.72E-03                                                                             | Paired immunoglobulin-like type 2 receptor alpha [Source:MGI Symbol,Acc:MGI:2450529]                                               |
|                       | <i>Hdac4</i>         |                 | 2.31E-02                                                                             | Histone deacetylase 4 [Source:MGI Symbol,Acc:MGI:3036234]                                                                          |
|                       | <i>Rnase6</i>        |                 | 2.31E-02                                                                             | Ribonuclease, RNase A family, 6 [Source:MGI Symbol,Acc:MGI:1925666]                                                                |
|                       | <i>Btd</i>           |                 | 2.31E-02                                                                             | Biotinidase [Source:MGI Symbol,Acc:MGI:1347001]                                                                                    |
|                       | <i>Pilrb2</i>        |                 | 2.31E-02                                                                             | Paired immunoglobulin-like type 2 receptor beta 2 [Source:MGI Symbol,Acc:MGI:2450535]                                              |
|                       | <i>Mvk</i>           |                 | 2.31E-02                                                                             | Mevalonate kinase [Source:MGI Symbol,Acc:MGI:107624]                                                                               |
|                       | <i>Arpin</i>         |                 | 2.91E-02                                                                             | Actin-related protein 2/3 complex inhibitor [Source:MGI Symbol,Acc:MGI:1917670]                                                    |
|                       | <i>Slc2a6</i>        |                 | 2.91E-02                                                                             | Solute carrier family 2 (facilitated glucose transporter), member 6 [Source:MGI Symbol,Acc:MGI:2443286]                            |
|                       | <i>Mcub</i>          |                 | 3.19E-02                                                                             | mitochondrial calcium uniporter dominant negative beta subunit [Source:MGI Symbol,Acc:MGI:1914065]                                 |
|                       | <i>Paqr7</i>         |                 | 3.19E-02                                                                             | Progesterin and adipoQ receptor family member VII [Source:MGI Symbol,Acc:MGI:1919154]                                              |
| 12wks                 | <i>Tmem216</i>       | Upregulation    | 2.63E-06                                                                             | Transmembrane protein 216 [Source:MGI Symbol,Acc:MGI:1920020]                                                                      |
|                       | <i>Ddx46</i>         |                 | 4.54E-06                                                                             | DEAD (Asp-Glu-Ala-Asp) box polypeptide 46 [Source:MGI Symbol,Acc:MGI:1920895]                                                      |
|                       | <i>Acaa1b</i>        |                 | 1.38E-05                                                                             | Acetyl-Coenzyme A acyltransferase 1B [Source:MGI Symbol,Acc:MGI:3605455]                                                           |
|                       | <i>Gmpr</i>          |                 | 2.79E-05                                                                             | Guanosine monophosphate reductase [Source:MGI Symbol,Acc:MGI:1913605]                                                              |
|                       | <i>Tc2n</i>          |                 | 3.12E-05                                                                             | Tandem C2 domains, nuclear [Source:MGI Symbol,Acc:MGI:1921663]                                                                     |
|                       | <i>Bzw2</i>          |                 | 3.73E-05                                                                             | Basic leucine zipper and W2 domains 2 [Source:MGI Symbol,Acc:MGI:1914162]                                                          |
|                       | <i>Dendd4a</i>       |                 | 5.04E-05                                                                             | DENN/MADD domain containing 4A [Source:MGI Symbol,Acc:MGI:2142979]                                                                 |
|                       | <i>Pparg</i>         |                 | 5.05E-05                                                                             | Peroxisome proliferator activated receptor gamma [Source:MGI Symbol,Acc:MGI:97747]                                                 |
|                       | <i>Prom1</i>         |                 | 6.97E-05                                                                             | Prominin 1 [Source:MGI Symbol,Acc:MGI:1100886]                                                                                     |
|                       | <i>Fabp1</i>         |                 | 9.26E-05                                                                             | Fatty acid binding protein 1, liver [Source:MGI Symbol,Acc:MGI:95479]                                                              |
| 12wks                 | <i>Slc3a2</i>        | Downregulation  | 5.47E-07                                                                             | Solute carrier family 3 (activators of dibasic and neutral amino acid transport), member 2 [Source:MGI Symbol,Acc:MGI:96955]       |
|                       | <i>Sc5d</i>          |                 | 5.47E-07                                                                             | Sterol-C5-desaturase [Source:MGI Symbol,Acc:MGI:1353611]                                                                           |
|                       | <i>Fat1f</i>         |                 | 5.47E-07                                                                             | Farnesyl diphosphate farnesyl transferase 1 [Source:MGI Symbol,Acc:MGI:102706]                                                     |
|                       | <i>Fdps</i>          |                 | 5.47E-07                                                                             | Farnesyl diphosphate synthetase [Source:MGI Symbol,Acc:MGI:104888]                                                                 |
|                       | <i>Ninj1</i>         |                 | 5.47E-07                                                                             | Ninjurin 1 [Source:MGI Symbol,Acc:MGI:1196617]                                                                                     |
|                       | <i>Slc2a6</i>        |                 | 5.47E-07                                                                             | Solute carrier family 2 (facilitated glucose transporter), member 6 [Source:MGI Symbol,Acc:MGI:2443286]                            |
|                       | <i>Zwint</i>         |                 | 6.40E-07                                                                             | ZW10 interactor [Source:MGI Symbol,Acc:MGI:1289227]                                                                                |
|                       | <i>Acss2</i>         |                 | 6.40E-07                                                                             | Acyl-CoA synthetase short-chain family member 2 [Source:MGI Symbol,Acc:MGI:1890410]                                                |
|                       | <i>Nampt</i>         |                 | 7.11E-07                                                                             | Nicotinamide phosphoribosyltransferase [Source:MGI Symbol,Acc:MGI:1929865]                                                         |
|                       | <i>Msmo1</i>         |                 | 7.66E-07                                                                             | Methylsterol monooxygenase 1 [Source:MGI Symbol,Acc:MGI:1913484]                                                                   |
| 40wks                 | <i>H2-Oa</i>         | Upregulation    | 1.33E-06                                                                             | Histocompatibility 2, O region alpha locus [Source:MGI Symbol,Acc:MGI:95924]                                                       |
|                       | <i>Cd209b</i>        |                 | 1.33E-06                                                                             | CD209b antigen [Source:MGI Symbol,Acc:MGI:1916415]                                                                                 |
|                       | <i>Slc1a3</i>        |                 | 8.93E-06                                                                             | Solute carrier family 1 (glial high affinity glutamate transporter), member 3 [Source:MGI Symbol,Acc:MGI:99917]                    |
|                       | <i>Hmcn1</i>         |                 | 3.40E-05                                                                             | Hemicentin 1 [Source:MGI Symbol,Acc:MGI:2685047]                                                                                   |
|                       | <i>H2-DMb1</i>       |                 | 3.40E-05                                                                             | Histocompatibility 2, class II, locus Mb1 [Source:MGI Symbol,Acc:MGI:95922]                                                        |
|                       | <i>Khl41</i>         |                 | 1.71E-04                                                                             | Kelch-like 41 [Source:MGI Symbol,Acc:MGI:2683854]                                                                                  |
|                       | <i>4930502E18Rik</i> |                 | 1.71E-04                                                                             | RIKEN cDNA 4930502E18 gene [Source:MGI Symbol,Acc:MGI:1922263]                                                                     |
|                       | <i>Zfx3</i>          |                 | 1.71E-04                                                                             | Zinc finger homeobox 3 [Source:MGI Symbol,Acc:MGI:99948]                                                                           |
|                       | <i>H2-Eb1</i>        |                 | 1.85E-04                                                                             | Histocompatibility 2, class II antigen E beta [Source:MGI Symbol,Acc:MGI:95901]                                                    |
|                       | <i>Cita</i>          |                 | 2.04E-04                                                                             | Class II transactivator [Source:MGI Symbol,Acc:MGI:108445]                                                                         |
| 40wks                 | <i>Fpr1</i>          | Downregulation  | 1.60E-04                                                                             | Formyl peptide receptor 1 [Source:MGI Symbol,Acc:MGI:107443]                                                                       |
|                       | <i>Emilin1</i>       |                 | 2.84E-04                                                                             | Elastin microfibril interfacer 1 [Source:MGI Symbol,Acc:MGI:1926189]                                                               |
|                       | <i>Fn1</i>           |                 | 3.40E-04                                                                             | Fibronectin 1 [Source:MGI Symbol,Acc:MGI:95566]                                                                                    |
|                       | <i>Egfem1</i>        |                 | 3.40E-04                                                                             | EGF-like and EMI domain containing 1 [Source:MGI Symbol,Acc:MGI:1922990]                                                           |
|                       | <i>Ubl3</i>          |                 | 6.48E-04                                                                             | Ubiquitin-like 3 [Source:MGI Symbol,Acc:MGI:1344373]                                                                               |
|                       | <i>Clec4e</i>        |                 | 8.29E-04                                                                             | C-type lectin domain family 4, member e [Source:MGI Symbol,Acc:MGI:1861232]                                                        |
|                       | <i>Tspan32</i>       |                 | 8.82E-04                                                                             | Tetraspanin 32 [Source:MGI Symbol,Acc:MGI:1350360]                                                                                 |
|                       | <i>Inka1</i>         |                 | 1.19E-03                                                                             | Inka box actin regulator 1 [Source:MGI Symbol,Acc:MGI:1915426]                                                                     |
|                       | <i>Ptgr1</i>         |                 | 1.27E-03                                                                             | Prostaglandin reductase 1 [Source:MGI Symbol,Acc:MGI:1914353]                                                                      |
|                       | <i>Psmf11</i>        |                 | 1.63E-03                                                                             | Proteasome (prosome, macropain) 26S subunit, non-ATPase, 11 [Source:MGI Symbol,Acc:MGI:1916327]                                    |

Table S6: Upregulated and downregulated gene sets in WT and KO AMs.

| GO: Molecular Function |                                               |          |             |          |
|------------------------|-----------------------------------------------|----------|-------------|----------|
| Comparison (KO vs WT)  | Pathway ID                                    | Set Size | Mean Log FC | FDR      |
| 4wks                   | GO:0003735 structural constituent of ribosome | 143      | -4.909      | 8.52E-04 |
| 8wks                   | GO:0030645 receptor regulator activity        | 123      | -3.762      | 2.52E-02 |
|                        | GO:0042277 peptide binding                    | 153      | -3.936      | 1.69E-02 |
|                        | GO:0008009 chemokine activity                 | 19       | -3.935      | 1.69E-02 |
|                        | GO:0003735 structural constituent of ribosome | 143      | -4.198      | 1.43E-02 |

| KEGG disease                                           |                                                        |                               |             |          |
|--------------------------------------------------------|--------------------------------------------------------|-------------------------------|-------------|----------|
| Comparison (KO vs WT)                                  | Pathway ID                                             | Set Size                      | Mean Log FC | FDR      |
| 12wks                                                  | mmu05012 Parkinson's disease                           | 117                           | 2.581       | 2.78E-02 |
|                                                        | mmu05016 Huntington's disease                          | 152                           | 3.886       | 2.47E-03 |
|                                                        | mmu04932 Non-alcoholic fatty liver disease (NAFLD)     | 127                           | 2.462       | 3.60E-02 |
|                                                        | mmu05418 Fluid shear stress and atherosclerosis        | 94                            | -2.968      | 1.87E-02 |
|                                                        | mmu04940 Type I diabetes mellitus                      | 30                            | -2.964      | 1.87E-02 |
|                                                        | mmu05320 Autoimmune thyroid disease                    | 26                            | -2.751      | 2.45E-02 |
|                                                        | mmu05332 Graft-versus-host disease                     | 27                            | -2.872      | 1.95E-02 |
|                                                        | mmu05330 Allograft rejection                           | 27                            | -2.989      | 1.87E-02 |
|                                                        | mmu05134 Legionellosis                                 | 51                            | -2.943      | 1.87E-02 |
|                                                        | mmu05167 Kaposi's sarcoma-associated herpesvirus infec | 149                           | -3.534      | 5.95E-03 |
|                                                        | mmu05162 Measles                                       | 93                            | -2.832      | 1.94E-02 |
|                                                        | mmu05169 Epstein-Barr virus infection                  | 167                           | -4.442      | 4.53E-04 |
|                                                        | mmu05160 Hepatitis C                                   | 116                           | -2.757      | 1.95E-02 |
|                                                        | mmu05168 Herpes simplex infection                      | 158                           | -3.156      | 1.30E-02 |
|                                                        | mmu05164 Influenza A                                   | 125                           | -3.305      | 1.04E-02 |
|                                                        | 40wks                                                  | mmu05016 Huntington's disease | 152         | 3.046    |
| mmu04940 Type I diabetes mellitus                      |                                                        | 30                            | 2.661       | 4.70E-02 |
| mmu05330 Allograft rejection                           |                                                        | 27                            | 3.027       | 4.60E-02 |
| mmu05134 Legionellosis                                 |                                                        | 51                            | 2.723       | 4.60E-02 |
| mmu05167 Kaposi's sarcoma-associated herpesvirus infec |                                                        | 149                           | 3.065       | 4.52E-02 |
| mmu05168 Herpes simplex infection                      |                                                        | 158                           | 2.819       | 4.60E-02 |
| mmu05164 Influenza A                                   |                                                        | 125                           | 3.000       | 4.52E-02 |
| mmu05418 Fluid shear stress and atherosclerosis        |                                                        | 94                            | -2.688      | 4.60E-02 |
| mmu05169 Epstein-Barr virus infection                  |                                                        | 167                           | -3.417      | 2.77E-02 |

| GO: Biological process                           |                                                  |          |             |          |
|--------------------------------------------------|--------------------------------------------------|----------|-------------|----------|
| Comparison (KO vs WT)                            | Pathway ID                                       | Set Size | Mean Log FC | FDR      |
| 12wks                                            | GO:0045087 innate immune response                | 422      | -5.641      | 5.59E-05 |
|                                                  | GO:0009607 response to biotic stimulus           | 495      | -5.333      | 8.08E-05 |
|                                                  | GO:0043207 response to external biotic stimulus  | 469      | -5.316      | 8.08E-05 |
|                                                  | GO:0051707 response to other organism            | 469      | -5.316      | 8.08E-05 |
|                                                  | GO:0098542 defense response to other organism    | 279      | -5.241      | 1.13E-04 |
|                                                  | GO:0034097 response to cytokine                  | 465      | -4.614      | 1.74E-03 |
|                                                  | GO:0001817 regulation of cytokine production     | 389      | -4.592      | 1.74E-03 |
|                                                  | GO:0009617 response to bacterium                 | 290      | -4.466      | 2.75E-03 |
|                                                  | GO:0001816 cytokine production                   | 430      | -4.427      | 2.75E-03 |
|                                                  | GO:0002252 immune effector process               | 443      | -4.410      | 2.75E-03 |
|                                                  | GO:0006954 inflammatory response                 | 348      | -4.206      | 6.53E-03 |
|                                                  | GO:0071345 cellular response to cytokine stimuli | 393      | -4.077      | 9.89E-03 |
|                                                  | GO:0051607 defense response to virus             | 154      | -3.987      | 1.43E-02 |
|                                                  | GO:0009615 response to virus                     | 187      | -3.893      | 1.86E-02 |
|                                                  | GO:0034341 response to interferon-gamma          | 63       | -3.843      | 3.14E-02 |
|                                                  | GO:0042742 defense response to bacterium         | 111      | -3.749      | 3.18E-02 |
| GO:0001819 positive regulation of cytokine produ | 262                                              | -3.709   | 3.18E-02    |          |
| GO:0006412 translation                           | 493                                              | 4.041    | 1.05E-02    |          |

| KEGG Metabolism       |                                              |          |             |          |
|-----------------------|----------------------------------------------|----------|-------------|----------|
| Comparison (KO vs WT) | Pathway ID                                   | Set Size | Mean Log FC | FDR      |
| 4wks                  | mmu03010 Ribosome                            | 133      | -5.421      | 2.18E-05 |
| 8wks                  | mmu04621 NOD-like receptor signaling pathway | 133      | -3.300      | 4.48E-02 |
|                       | mmu00100 Steroid biosynthesis                | 15       | -3.432      | 4.48E-02 |
|                       | mmu03010 Ribosome                            | 133      | -4.142      | 3.21E-02 |
| 12wks                 | mmu00190 Oxidative phosphorylation           | 112      | 3.124       | 2.88E-02 |
|                       | mmu03010 Ribosome                            | 133      | 5.576       | 1.05E-05 |
|                       | mmu04978 Mineral absorption                  | 25       | -3.301      | 2.88E-02 |
|                       | mmu03050 Proteasome                          | 44       | -3.211      | 2.88E-02 |
|                       | mmu04612 Antigen processing and presentation | 55       | -3.401      | 2.14E-02 |
|                       | mmu04668 TNF signaling pathway               | 90       | -3.368      | 2.14E-02 |
|                       | mmu04621 NOD-like receptor signaling pathway | 133      | -4.040      | 2.52E-03 |
|                       | mmu00100 Steroid biosynthesis                | 15       | -5.414      | 5.18E-04 |
| 40wks                 | mmu03010 Ribosome                            | 133      | -4.199      | 3.74E-03 |
